# Supplementary material for: Procurement Policies for Mobile-Promotion Platforms
Source: Atypon-hosted journal article supplement (doi:10.1287/mnsc.2017.2837), 2017-10-02
Supplement: mnsc.2017.2837-sm.pdf [file mnsc.2017.2837-sm.pdf]

## Appendix I: Proofs of Technical Results

**Proof of Theorem 1:** Consider any policy  $\pi$  which is feasible to  $\mathcal{P}_{static}^E(\vec{\beta})$ . Define the vector  $(\tilde{x}, \tilde{y})$  as follows:

$$\tilde{x}_{s,i,l} = \frac{\sum_{t \in \mathcal{T}_{s,i}} \mathbb{E}_{\vec{U}_{t-1}} [x_{t,l}^\pi(\vec{j}_t^\pi(\vec{U}_{t-1}))]}{\Delta}, \quad (22)$$

$$\tilde{y}_{s,i,l,c} = \frac{\sum_{t \in \mathcal{T}_{s,i}} \mathbb{E}_{\vec{U}_{t-1}} [y_{t,l,c}^\pi(\vec{j}_t^\pi(\vec{U}_{t-1}))]}{\Delta}. \quad (23)$$

Our proof involves demonstrating the following claims:

- (a)  $(\tilde{x}, \tilde{y})$  is feasible to  $\hat{\mathcal{P}}(\vec{\beta})$ .
- (b)  $\pi(\vec{\beta})$  is feasible to  $\mathcal{P}_{static}^E(\vec{\beta})$ .
- (c)  $f^\pi \geq \hat{f}(\tilde{x})$ .
- (d)  $\hat{f}(\tilde{x}) \geq \hat{f}(\hat{x}^*(\vec{\beta}))$ .
- (e)  $\hat{f}(\hat{x}^*(\vec{\beta})) = f^{\pi(\vec{\beta})}$ .

Combining (a) – (e) we obtain the desired result that  $f^{\pi(\vec{\beta})} \leq f^\pi$  for any policy  $\pi$  which is feasible for  $\mathcal{P}_{static}^E(\vec{\beta})$ . Thus,  $\pi(\vec{\beta})$  is optimal for  $\mathcal{P}_{static}^E(\vec{\beta})$ . It only remains to show (a) – (e).

Proof of (a): The feasibility of  $(\tilde{x}, \tilde{y})$  for  $\hat{\mathcal{P}}(\vec{\beta})$  follows from its definition and the feasibility of policy  $\pi$  for problem  $\mathcal{P}_{static}^E(\vec{\beta})$ .

Proof of (b): The feasibility of  $\pi(\vec{\beta})$  for problem  $\mathcal{P}_{static}^E(\vec{\beta})$  follows from its definition and the feasibility of  $(\hat{x}^*(\vec{\beta}), \hat{y}^*(\vec{\beta}))$  for problem  $\hat{\mathcal{P}}(\vec{\beta})$ .

Proof of (c): The following two inequalities follow from Jensen's inequality:

$$\mathbb{E}_{\vec{U}_{t-1}} [f_{i,l}(x_{t,l}^\pi(\vec{j}_t^\pi(\vec{U}_{t-1})))] \geq f_{i,l}(\mathbb{E}_{\vec{U}_{t-1}} [x_{t,l}^\pi(\vec{j}_t^\pi(\vec{U}_{t-1}))]), \quad \forall t \in \mathcal{T}_{s,i}, s \in \mathcal{S}, i \in \mathcal{I}, l \in \mathcal{L},$$

and

$$\frac{\sum_{t \in \mathcal{T}_{s,i}} \mathbb{E}_{\vec{U}_{t-1}} [f_{i,l}(x_{t,l}^\pi(\vec{j}_t^\pi(\vec{U}_{t-1})))]}{\Delta} \geq f_{i,l} \left( \frac{\sum_{t \in \mathcal{T}_{s,i}} \mathbb{E}_{\vec{U}_{t-1}} [x_{t,l}^\pi(\vec{j}_t^\pi(\vec{U}_{t-1}))]}{\Delta} \right) = f_{i,l}(\tilde{x}_{i,l}), \quad \forall s \in \mathcal{S}, i \in \mathcal{I}, l \in \mathcal{L}.$$

Multiplying both sides by  $\Delta q_{i,l}$  and summing over  $l \in \mathcal{L}$ , we obtain

$$\sum_{t \in \mathcal{T}_{s,i}} \sum_{l \in \mathcal{L}} q_{i,l} \mathbb{E}_{\vec{U}_{t-1}} [f_{i,l}(x_{t,l}^\pi(\vec{j}_t^\pi(\vec{U}_{t-1})))] \geq \Delta \sum_{l \in \mathcal{L}} q_{i,l} f_{i,l}(\tilde{x}_{i,l}). \quad \text{Summing over } s \in \mathcal{S}, i \in \mathcal{I}, \text{ we have}$$

$$f^\pi \geq \hat{f}(\tilde{x}).$$

Proof of (d): This claim follows immediately from claim (a) and the optimality of  $\hat{x}^*(\vec{\beta})$  for problem  $\hat{\mathcal{P}}(\vec{\beta})$ .

Proof of (e): Since  $\pi(\vec{\beta})$  is a state independent policy, directly substituting its definition in the expression  $f^\pi$  gives  $f^{\pi(\vec{\beta})} = \hat{f}(\hat{x}^*(\vec{\beta}))$ .  $\blacksquare$

**Proof of Theorem 2:** We want to find a bound for the ratio

$$\frac{f^{\pi(\vec{\beta}^*)}}{\text{Opt}(\vec{M}, \alpha)}.$$

Recall that problem  $\mathcal{P}_{static}^E(\alpha\vec{M})$  is a relaxation of problem  $\mathcal{P}_{static}(\vec{M}, \alpha)$  and that  $\hat{\mathcal{P}}(\alpha\vec{M})$  is equivalent to  $\mathcal{P}_{static}^E(\alpha\vec{M})$ . Let  $\pi(\alpha\vec{M}) = (\hat{x}^*(\alpha\vec{M}), \hat{y}^*(\alpha\vec{M}))$  be the solution of problem  $\hat{\mathcal{P}}(\alpha\vec{M})$ , where  $\hat{x}^*(\alpha\vec{M}) = (\hat{x}_{s,i,l}^*(\alpha\vec{M}) : s \in \mathcal{S}, i \in \mathcal{I}, l \in \mathcal{L})$  and  $\hat{y}^*(\alpha\vec{M}) = (\hat{y}_{s,i,l,c}^*(\alpha\vec{M}) : s \in \mathcal{S}, i \in \mathcal{I}, l \in \mathcal{L}, c \in \mathcal{C})$ . Therefore,

$$\text{Opt}(\vec{M}, \alpha) \geq \hat{f}(\hat{x}^*(\alpha\vec{M})) = \sum_{s \in \mathcal{S}} \sum_{i \in \mathcal{I}} \sum_{l \in \mathcal{L}} \Delta q_{i,l} f_{i,l}(\hat{x}_{s,i,l}^*(\alpha\vec{M})). \quad (24)$$

We can obtain a feasible solution for problem  $\hat{\mathcal{P}}(\vec{M} + z_\alpha \vec{M}_r)$ , where  $\vec{M}_r \in \mathbb{R}_+^{|\mathcal{C}|}$  is a vector with elements  $\sqrt{M_c}, c \in \mathcal{C}$ , by simply multiplying the solution  $(\hat{x}^*(\alpha\vec{M}), \hat{y}^*(\alpha\vec{M}))$  of problem  $\hat{\mathcal{P}}(\alpha\vec{M})$  by the factor

$$\gamma = \max_{c \in \mathcal{C}} \left[ \frac{M_c + z_\alpha \sqrt{M_c}}{\alpha M_c} \right] = \max_{c \in \mathcal{C}} \left[ \frac{1}{\alpha} \left( 1 + \frac{z_\alpha}{\sqrt{M_c}} \right) \right].$$

Thus,  $\pi^\gamma(\alpha\vec{M}) := (\gamma\hat{x}^*(\alpha\vec{M}), \gamma\hat{y}^*(\alpha\vec{M}))$  is a feasible solution for problem  $\hat{\mathcal{P}}(\vec{M} + z_\alpha \vec{M}_r)$ .

We know that the cost associated with policy  $\pi^\gamma(\alpha\vec{M})$  is  $f^{\pi^\gamma(\alpha\vec{M})}$ . Since  $\pi^\gamma(\alpha\vec{M})$  is only a feasible policy for problem  $\hat{\mathcal{P}}(\vec{M} + z_\alpha \vec{M}_r)$ , the cost corresponding to  $\pi^\gamma(\alpha\vec{M})$ , i.e.,  $f^{\pi^\gamma(\alpha\vec{M})}$ , is higher than the optimal cost for problem  $\hat{\mathcal{P}}(\vec{M} + z_\alpha \vec{M}_r)$ , i.e.,  $f^{\pi(\vec{\beta}^*)}$ . Thus,  $f^{\pi(\vec{\beta}^*)} \leq f^{\pi^\gamma(\alpha\vec{M})}$ . We also know that  $f^{\pi^\gamma(\alpha\vec{M})} = \sum_{s \in \mathcal{S}} \sum_{i \in \mathcal{I}} \sum_{l \in \mathcal{L}} \Delta q_{i,l} f_{i,l}(\gamma\hat{x}_{s,i,l}^*(\alpha\vec{M}))$ . Therefore,

$$f^{\pi(\vec{\beta}^*)} \leq \sum_{s \in \mathcal{S}} \sum_{i \in \mathcal{I}} \sum_{l \in \mathcal{L}} \Delta q_{i,l} f_{i,l}(\gamma\hat{x}_{s,i,l}^*(\alpha\vec{M})). \quad (25)$$

From (24) and (25) we can write,

$$\frac{f^{\pi(\vec{\beta}^*)}}{\text{Opt}(\vec{M}, \alpha)} \leq \frac{\sum_{s \in \mathcal{S}} \sum_{i \in \mathcal{I}} \sum_{l \in \mathcal{L}} \Delta q_{i,l} f_{i,l}(\gamma\hat{x}_{s,i,l}^*(\alpha\vec{M}))}{\sum_{s \in \mathcal{S}} \sum_{i \in \mathcal{I}} \sum_{l \in \mathcal{L}} \Delta q_{i,l} f_{i,l}(\hat{x}_{s,i,l}^*(\alpha\vec{M}))}. \quad (26)$$

Now, consider the ratio,

$$\frac{f_{i,l}(\gamma\hat{x}_{s,i,l}^*(\alpha\vec{M}))}{f_{i,l}(\hat{x}_{s,i,l}^*(\alpha\vec{M}))}.$$

Since  $\gamma \geq 1$ ,  $\gamma \hat{x}_{s,i,l}^*(\alpha \vec{M}) \geq \hat{x}_{s,i,l}^*(\alpha \vec{M})$ . Further, we know that  $f_{i,l}(\cdot)$  is convex. Thus, we can write,

$$\begin{aligned} \frac{f_{i,l}(\gamma \hat{x}_{s,i,l}^*(\alpha \vec{M}))}{f_{i,l}(\hat{x}_{s,i,l}^*(\alpha \vec{M}))} &\leq \frac{f_{i,l}(\gamma \hat{x}_{s,i,l}^*(\alpha \vec{M}))}{f_{i,l}(\gamma \hat{x}_{s,i,l}^*(\alpha \vec{M})) - (\gamma \hat{x}_{s,i,l}^*(\alpha \vec{M}) - \hat{x}_{s,i,l}^*(\alpha \vec{M})) f'_{i,l}(\gamma \hat{x}_{s,i,l}^*(\alpha \vec{M}))}, \\ &= \frac{f_{i,l}(\gamma \hat{x}_{s,i,l}^*(\alpha \vec{M}))}{f_{i,l}(\gamma \hat{x}_{s,i,l}^*(\alpha \vec{M})) - (\gamma - 1) \hat{x}_{s,i,l}^*(\alpha \vec{M}) f'_{i,l}(\gamma \hat{x}_{s,i,l}^*(\alpha \vec{M}))}, \\ &= \frac{1}{1 - \frac{(\gamma-1) \gamma \hat{x}_{s,i,l}^*(\alpha \vec{M}) f'_{i,l}(\gamma \hat{x}_{s,i,l}^*(\alpha \vec{M}))}{f_{i,l}(\gamma \hat{x}_{s,i,l}^*(\alpha \vec{M}))}}. \end{aligned}$$

Now, the above inequality can be rewritten as

$$\begin{aligned} \frac{f_{i,l}(\gamma \hat{x}_{s,i,l}^*(\alpha \vec{M}))}{f_{i,l}(\hat{x}_{s,i,l}^*(\alpha \vec{M}))} &\leq \frac{1}{1 - \frac{(\gamma-1)}{\gamma} \psi_{i,l}(\gamma \hat{x}_{s,i,l}^*(\alpha \vec{M}))}, \\ &\leq \frac{1}{1 - \frac{(\gamma-1)}{\gamma} \overline{\psi}}. \end{aligned} \tag{27}$$

Using (26) and (27), we obtain the desired result that

$$\frac{f^{\pi(\vec{\beta}^*)}}{\text{Opt}(\vec{M}, \alpha)} \leq \frac{1}{1 - \frac{(\gamma-1)}{\gamma} \overline{\psi}}.$$

This completes the proof of Theorem 2. ■

**Proof of Proposition 1:** The simple intuition behind the proof is as follows: Consider the set of active campaigns at location  $l$  at any point in time. As time progresses, some campaigns end, resulting in fewer campaigns being active in the later time blocks. Thus, a higher number of active campaigns in the earlier time blocks leads to higher target win-probabilities than those in the later time blocks.

Let  $\hat{x}(\vec{\beta}) = \{\hat{x}_{s,i,l}(\vec{\beta}) : s \in \mathcal{S}, i \in \mathcal{I}, l \in \mathcal{L}\}$  and  $\hat{y}(\vec{\beta}) = \{\hat{y}_{s,i,l,c}(\vec{\beta}) : s \in \mathcal{S}, i \in \mathcal{I}, l \in \mathcal{L}, c \in \mathcal{C}\}$  be an optimal solution of problem  $\hat{\mathcal{P}}(\vec{\beta})$ . Consider an arbitrary time block  $i \in \mathcal{I}$  and location  $l \in \mathcal{L}$ , and assume, for a contradiction, that there exist two consecutive time periods  $d$  and  $d+1$  with  $\hat{x}_{d,i,l}(\vec{\beta}) < \hat{x}_{d+1,i,l}(\vec{\beta})$ . That is, in time block  $i$  at location  $l$ , the target win-probability in the  $d$ -th period is strictly less than the target win-probability in the  $(d+1)$ -th period. We will construct another feasible solution  $(\hat{x}'(\vec{\beta}), \hat{y}'(\vec{\beta}))$  such that (i)  $\hat{x}'_{d,i,l}(\vec{\beta}) = \hat{x}_{d+1,i,l}(\vec{\beta})$ , (ii)  $\hat{x}'_{s,i,l}(\vec{\beta}) = \hat{x}_{s,i,l}(\vec{\beta})$ ,  $s \in \mathcal{S} \setminus \{d, d+1\}$ , (iii)  $\hat{x}'_{s',i',l'}(\vec{\beta}) = \hat{x}_{s',i',l'}(\vec{\beta})$ ,  $(s', i', l') \in \mathcal{S} \times \mathcal{I} \times \mathcal{L} \setminus \{(d, i, l), (d+1, i, l)\}$ , and (iv) the objective function value of the solution  $(\hat{x}'(\vec{\beta}), \hat{y}'(\vec{\beta}))$  is strictly less than that of the solution  $(\hat{x}(\vec{\beta}), \hat{y}(\vec{\beta}))$ .

Let

$$\bar{x}_{d,d+1,i,l}(\vec{\beta}) = \frac{\hat{x}_{d,i,l}(\vec{\beta}) + \hat{x}_{d+1,i,l}(\vec{\beta})}{2}.$$

For location  $l$  and time block  $i$ , define

$$\begin{aligned}\hat{x}'_{d,i,l}(\vec{\beta}) &= \hat{x}'_{d+1,i,l}(\vec{\beta}) = \bar{x}_{d,d+1,i,l}(\vec{\beta}), \\ \hat{x}'_{s,i,l}(\vec{\beta}) &= \hat{x}_{s,i,l}(\vec{\beta}), \quad \forall s \in \mathcal{S} \setminus \{d, d+1\}.\end{aligned}\tag{28}$$

For all other time periods, time blocks, and locations define

$$\hat{x}'_{s',i',l'}(\vec{\beta}) = \hat{x}_{s',i',l'}(\vec{\beta}), \quad (s', i', l') \in \mathcal{S} \times \mathcal{I} \times \mathcal{L} \setminus \{(d, i, l), (d+1, i, l)\}.$$

We now define the allocation probabilities  $\hat{y}'(\vec{\beta})$  by adjusting the original allocation probabilities  $\hat{y}(\vec{\beta})$ . We do this by advancing the procurment for some campaigns from time period  $d+1$  to time period  $d$ . Let

$$c^* = \min \left\{ \tilde{c} : \sum_{c=1}^{\tilde{c}} \hat{y}_{d+1,i,l,c}(\vec{\beta}) \geq \hat{x}_{d+1,i,l} - \bar{x}_{d,d+1,i,l}(\vec{\beta}) \right\}.$$

For location  $l$ , define

$$\begin{aligned}\hat{y}'_{d,i,l,c}(\vec{\beta}) &= \hat{y}_{d,i,l,c}(\vec{\beta}) + \hat{y}_{d+1,i,l,c}(\vec{\beta}), & \forall c \in \{1, 2, \dots, c^* - 1\}, \\ \hat{y}'_{d+1,i,l,c}(\vec{\beta}) &= 0, & \forall c \in \{1, 2, \dots, c^* - 1\}, \\ \hat{y}'_{d,i,l,c^*}(\vec{\beta}) &= \hat{y}_{d,i,l,c^*}(\vec{\beta}) + \left[ (\hat{x}_{d+1,i,l}(\vec{\beta}) - \bar{x}_{d,d+1,i,l}(\vec{\beta})) - \sum_{c=1}^{c^*-1} \hat{y}_{d+1,i,l,c}(\vec{\beta}) \right], \\ \hat{y}'_{d+1,i,l,c^*}(\vec{\beta}) &= \hat{y}_{d+1,i,l,c^*}(\vec{\beta}) - \left[ (\hat{x}_{d+1,i,l}(\vec{\beta}) - \bar{x}_{d,d+1,i,l}(\vec{\beta})) - \sum_{c=1}^{c^*-1} \hat{y}_{d+1,i,l,c}(\vec{\beta}) \right], \\ \hat{y}'_{d,i,l,c}(\vec{\beta}) &= \hat{y}_{d,i,l,c}(\vec{\beta}) & \forall c \in \{c^* + 1, c^* + 2, \dots, |\mathcal{C}|\}, \\ \hat{y}'_{d+1,i,l,c}(\vec{\beta}) &= \hat{y}_{d+1,i,l,c}(\vec{\beta}) & \forall c \in \{c^* + 1, c^* + 2, \dots, |\mathcal{C}|\}.\end{aligned}$$

For all other time periods, time blocks, and locations define

$$\hat{y}'_{s',i',l',c}(\vec{\beta}) = \hat{y}_{s',i',l',c}(\vec{\beta}), \quad (s', i', l') \in \mathcal{S} \times \mathcal{I} \times \mathcal{L} \setminus \{(d, i, l), (d+1, i, l)\}, \quad c \in \mathcal{C}.$$

It is easy to verify that  $(\hat{x}'(\vec{\beta}), \hat{y}'(\vec{\beta}))$  is a feasible solution of problem  $\hat{\mathcal{P}}(\vec{\beta})$ . The fact that the cost of  $(\hat{x}'(\vec{\beta}), \hat{y}'(\vec{\beta}))$  is strictly less than that of  $(\hat{x}(\vec{\beta}), \hat{y}(\vec{\beta}))$  is a direct consequence of the strict convexity of  $f_{i,l}(\cdot)$ . This completes the proof.  $\blacksquare$

**Proof of Proposition 2:** Define  $\hat{x}^*(\vec{\beta}) = \{\hat{x}_{s,i,l}^*(\vec{\beta}) : s \in \mathcal{S}, i \in \mathcal{I}, l \in \mathcal{L}\}$  and  $\hat{y}^*(\vec{\beta}) = \{\hat{y}_{s,i,l,c}^*(\vec{\beta}) : s \in \mathcal{S}, i \in \mathcal{I}, l \in \mathcal{L}, c \in \mathcal{C}\}$ . Let  $(\hat{x}^*(\vec{\beta}), \hat{y}^*(\vec{\beta}))$  be an optimal solution of problem  $\hat{\mathcal{P}}(\vec{\beta})$ . We want to prove that the optimal win-probability in location  $l$  during time block  $i$  of time period  $s$  decreases with an

increase in the impression-arrival probability  $q_{i,l}$ . That is, we want to show that  $\hat{x}_{s,i,l}^*(\vec{\beta})$  decreases with  $q_{i,l}$ . Without loss of generality, we prove this for  $\hat{x}_{1,1,1}^*(\vec{\beta})$ , i.e., we prove that  $\hat{x}_{1,1,1}^*(\vec{\beta})$  decreases with an increase in  $q_{1,1}$ . Define  $\mathcal{B}_{-1} = \mathcal{S} \times \mathcal{I} \times \mathcal{L} \setminus (1, 1, 1)$ . Let  $\hat{x}_{-1}(\vec{\beta}) = \{\hat{x}_{s,i,l}(\vec{\beta}) : (s, i, l) \in \mathcal{B}_{-1}\}$ . We now define a new problem in which for a given value of win-probability in location  $l = 1$  for time block  $i = 1$  and time period  $s = 1$ , we find all other win-probabilities. For a given value of  $\hat{x}_{1,1,1}$ , we define  $z = \Delta q_{1,1} \hat{x}_{1,1,1}$ .

Thus, we solve the following optimization problem to obtain the value of objective function at the optimal values of the other win-probabilities, given  $\hat{x}_{1,1,1}$ :

$$\hat{\mathcal{P}}_{-1}(\vec{\beta}) : \left\{ \begin{array}{l} \mathcal{F}(z) = \min_{\hat{x}_{-1}, \hat{y}} \sum_{(s,i,l) \in \mathcal{B}_{-1}} \Delta q_{i,l} f_{i,l}(\hat{x}_{s,i,l}) \\ \text{subject to:} \\ \sum_{c \in \mathcal{C}} \hat{y}_{s,i,l,c} = \hat{x}_{s,i,l}, \quad \forall (s, i, l) \in \mathcal{B}_{-1}, \\ \Delta q_{1,1} \sum_{c \in \mathcal{C}} \hat{y}_{1,1,1,c} = z, \\ \sum_{(s,i,l) \in \mathcal{B}_{-1}} \Delta q_{i,l} \hat{y}_{s,i,l,c} + \Delta q_{1,1} \hat{y}_{1,1,1,c} \geq \beta_c, \quad \forall c \in \mathcal{C}, K_c > 1, \\ \hat{y}_{s,i,l,c} = 0, \quad \forall c \in \mathcal{C}, l \in \mathcal{L}_c, i \in \mathcal{I}, s > K_c, \\ \hat{x}_{s,i,l} \in [0, 1], \quad \forall (s, i, l) \in \mathcal{B}_{-1}, \\ \hat{y}_{s,i,l,c} \in [0, 1], \quad \forall (s, i, l) \in \mathcal{S} \times \mathcal{I} \times \mathcal{L}, c \in \mathcal{C}. \end{array} \right. \quad (29)$$

$$\sum_{(s,i,l) \in \mathcal{B}_{-1}} \Delta q_{i,l} \hat{y}_{s,i,l,c} + \Delta q_{1,1} \hat{y}_{1,1,1,c} \geq \beta_c, \quad \forall c \in \mathcal{C}, K_c > 1, \quad (30)$$

$$\hat{y}_{s,i,l,c} = 0, \quad \forall c \in \mathcal{C}, l \in \mathcal{L}_c, i \in \mathcal{I}, s > K_c, \quad (31)$$

$$\hat{x}_{s,i,l} \in [0, 1], \quad \forall (s, i, l) \in \mathcal{B}_{-1},$$

$$\hat{y}_{s,i,l,c} \in [0, 1], \quad \forall (s, i, l) \in \mathcal{S} \times \mathcal{I} \times \mathcal{L}, c \in \mathcal{C}.$$

Since  $f_{i,l}(\cdot)$  is a convex function and minimization preserves convexity, function  $\mathcal{F}(z)$  is a convex function of  $z$ . For a given value of the  $z$ , we can obtain the value of  $\mathcal{F}(z)$  by solving the above optimization problem. Thus, we can find the optimal value of  $\hat{x}_{1,1,1}$  by solving the following problem:

$$\min_{0 \leq \hat{x}_{1,1,1} \leq 1} \Delta q_{1,1} f_{1,1}(\hat{x}_{1,1,1}) + \mathcal{F}(\Delta q_{1,1} \hat{x}_{1,1,1}).$$

Let  $\hat{x}_{1,1,1}^*(\vec{\beta})$  be an optimal solution of the above problem. Then, the first-order condition for the above optimization problem results in

$$f'_{1,1}(\hat{x}_{1,1,1}^*(\vec{\beta})) + \mathcal{F}'(\Delta q_{1,1} \hat{x}_{1,1,1}^*(\vec{\beta})) = 0. \quad (32)$$

Since  $f_{1,1}(\cdot)$  and  $\mathcal{F}(\cdot)$  are convex functions,  $f'_{1,1}(\cdot)$  and  $\mathcal{F}'(\cdot)$  are increasing functions. It now immediately follows that  $\hat{x}_{1,1,1}^*(\vec{\beta})$  decreases with an increase in  $q_{1,1}$ .  $\blacksquare$

**Proof of Corollary 3:** We want to find a bound for the ratio

$$\frac{\mathbb{E}[G(\bar{\mathbf{M}})]}{G(\alpha \mathbf{M})}. \quad (33)$$

Recall that  $G(\bar{\mathbf{M}})$  is the objective function of problem  $\mathcal{P}_1(\bar{\mathbf{M}})$  and  $G(\alpha\mathbf{M})$  is the objective function of problem  $\mathcal{P}_1(\alpha\mathbf{M})$ . Let  $\pi(\alpha\mathbf{M}) = (\hat{x}^*(\alpha\mathbf{M}), \hat{y}^*(\alpha\mathbf{M}))$  be the solution of problem  $\mathcal{P}_1(\alpha\mathbf{M})$ , where  $\hat{x}^*(\alpha\mathbf{M}) = (\hat{x}_{i,l}^*(\alpha\mathbf{M}) : i \in \mathcal{I}, l \in \mathcal{L})$  and  $\hat{y}^*(\alpha\mathbf{M}) = (\hat{y}_{i,l,c}^*(\alpha\mathbf{M}) : i \in \mathcal{I}, l \in \mathcal{L}, c \in \mathcal{C})$ .

We can obtain a feasible solution for problem  $\mathcal{P}_1(\bar{\mathbf{M}})$  by simply multiplying the solution  $(\hat{x}^*(\alpha\mathbf{M}), \hat{y}^*(\alpha\mathbf{M}))$  of problem  $\mathcal{P}_1(\alpha\mathbf{M})$  by a factor

$$\gamma^r = \max_{c \in \mathcal{C}} \left[ \frac{\bar{M}_c}{\alpha M_c} \right],$$

where  $r$  stands for our rolling-horizon policy. Since  $\bar{M}_c$  is a random variable,  $\gamma^r$  is also a random variable. Therefore, we have

$$\frac{\mathbb{E}[G(\bar{\mathbf{M}})]}{G(\alpha\mathbf{M})} \leq \frac{\Delta \sum_{i \in \mathcal{I}} \sum_{l \in \mathcal{L}} \mathbb{E}_{\gamma^r} \left[ q_{i,l} f_{i,l}(\gamma^r \hat{x}_{i,l}^*(\alpha\mathbf{M})) \right]}{\Delta \sum_{i \in \mathcal{I}} \sum_{l \in \mathcal{L}} \left[ q_{i,l} f_{i,l}(\hat{x}_{i,l}^*(\alpha\mathbf{M})) \right]}. \quad (34)$$

We know that

$$\bar{M}_{s,c} = \sum_{\hat{s}=s-K+1}^s \frac{\tilde{M}_{\hat{s},c}}{K} + z_\alpha \sqrt{\frac{\tilde{M}_{s,c}}{K}}.$$

We know that the support of the random variable  $\tilde{M}_{s,c}$  is  $[0, M_c^{max}]$ . Thus, we have  $\bar{M}_{s,c} \leq M_c^{max} + z_\alpha \sqrt{K M_c^{max}}$ .

We now define

$$\gamma_{max}^r = \max_{c \in \mathcal{C}} \left[ \frac{M_c^{max} + z_\alpha \sqrt{K M_c^{max}}}{\alpha M_c} \right].$$

It is easy to see that  $\gamma^r \leq \gamma_{max}^r$  with probability 1. Thus, from (34) we have

$$\frac{\mathbb{E}[G(\bar{\mathbf{M}})]}{G(\alpha\mathbf{M})} \leq \frac{\sum_{i \in \mathcal{I}} \sum_{l \in \mathcal{L}} \left[ q_{i,l} f_{i,l}(\gamma_{max}^r \hat{x}_{i,l}^*(\alpha\mathbf{M})) \right]}{\sum_{i \in \mathcal{I}} \sum_{l \in \mathcal{L}} \left[ q_{i,l} f_{i,l}(\hat{x}_{i,l}^*(\alpha\mathbf{M})) \right]}. \quad (35)$$

Now, consider the ratio,

$$\frac{f_{i,l}(\gamma_{max}^r \hat{x}_{i,l}^*(\alpha\mathbf{M}))}{f_{i,l}(\hat{x}_{i,l}^*(\alpha\mathbf{M}))}.$$

By following an analysis identical to that in the proof of Theorem 2, we obtain

$$\frac{f_{i,l}(\gamma_{max}^r \hat{x}_{i,l}^*(\alpha\mathbf{M}))}{f_{i,l}(\hat{x}_{i,l}^*(\alpha\mathbf{M}))} \leq \frac{1}{1 - \frac{(\gamma_{max}^r - 1)}{\gamma_{max}^r} \bar{\psi}_r}. \quad (36)$$

Using (33) and (36), we obtain the desired result that

$$\frac{\mathbb{E}[G(\bar{\mathbf{M}})]}{G(\alpha\mathbf{M})} \leq \frac{1}{1 - \frac{(\gamma_{max}^r - 1)}{\gamma_{max}^r} \bar{\psi}_r}.$$

This completes the proof of Corollary 3. ■

## Appendix II: Details of the Regression for Estimating the Win-Curves Using Real Data (Section 4.2)

Here we provide the details of our logistic regression to estimate the win-curves. A few fields in our dataset are: (a) winning status (binary variable taking value 1 when the bid is won, 0 otherwise), (b) click status (binary variable taking value 1 if the impression is clicked, 0 otherwise), (c) bid amount, (d) zip-code, (e) device maker (Apple, Samsung, etc.), (f) operating system (iOS, android, etc.). In the data set, we have 52,460 records corresponding to 5 different zip-codes in the Boston area. We ran five different regressions, corresponding to each of the five zip-codes, to estimate the win-curves in the respective locations. The bid amount is the independent variable and the winning status is the dependent variable. After estimating the regression coefficients, we also applied the chi-square test to check the goodness-of-fit of the regression model. For location  $l \in \{1, 2, 3, 4, 5\}$ , (locations 1, 2, 3, 4, and 5, corresponding to zip-codes 02110, 02114, 02116, 02118, and 02119, respectively) we estimate the win-probability for a bid  $b$  as  $x_l(b) = \frac{e^{\beta_0^l + \beta_1^l b}}{1 + e^{\beta_0^l + \beta_1^l b}}$ . Then, we obtain the expected-cost function for location  $l$  using the relation  $f_l(x) = x_l b_l(x)$ , where  $b_l(\cdot)$  is the inverse function of  $x_l(\cdot)$ . The estimated function  $f_l(\cdot)$  is convex at each location, as is assumed in our theoretical analysis (see Figure 5). The results of the regression and the goodness-of-fit test for each zip-code are in Table 1.

**Table 1 Results of the Regression**

| Zip Code | Number of Records | Regression Constant ( $\beta_0^l$ ) | Regression Coefficient for Bid ( $\beta_1^l$ ) | Chi-Square Test Statistic |
|----------|-------------------|-------------------------------------|------------------------------------------------|---------------------------|
| 02110    | 1086              | -2.281***<br>(std. error: 0.2141)   | 0.7051***<br>(std. error: 0.1290)              | 31.23302***               |
| 02114    | 27693             | -2.291***<br>(std. error: 0.03693)  | 1.04294***<br>(std. error: 0.02224)            | 2415.644***               |
| 02116    | 6794              | -1.905***<br>(std. error: 0.07184)  | 0.87651***<br>(std. error: 0.04388)            | 426.4403***               |
| 02118    | 2833              | -1.936***<br>(std. error: 0.11432)  | 0.76762***<br>(std. error: 0.06958)            | 128.1244***               |
| 02119    | 14054             | -2.193***<br>(std. error: 0.05212)  | 0.97615***<br>(std. error: 0.03133)            | 1053.156***               |

Significance codes: '\*\*\*'  $p < 0.001$ , '\*\*'  $p < 0.01$ , '\*'  $p < 0.05$ , '.'  $p < 0.1$ . The chi-square test with p-value of less than 0.001 tells us that our model as a whole fits significantly better than an empty model.
